# Supplementary material for: Association Between Intravenous Magnesium Therapy in the Emergency Department and Subsequent Hospitalization Among Pediatric Patients With Refractory Acute Asthma: Secondary Analysis of a Randomized Clinical Trial
Source: PubMed Central journal article supplement (PMC8290299; doi:10.1001/jamanetworkopen.2021.17542), 2021-07-19
Supplement: jamanetwopen-e2117542-s002.pdf [file jamanetwopen-e2117542-s002.pdf]

\*Indicates required information. Only first name, last name, and suffix will appear in PubMed.

| <b>*Group Name(s): Pediatric Emergency Research Canada</b> |                   |                              |                         |                                                                                                                                                                                                                                                  |                                                 |                                                                |                                                                                                   |
|------------------------------------------------------------|-------------------|------------------------------|-------------------------|--------------------------------------------------------------------------------------------------------------------------------------------------------------------------------------------------------------------------------------------------|-------------------------------------------------|----------------------------------------------------------------|---------------------------------------------------------------------------------------------------|
| <b>*First Name and Middle Initial(s)</b>                   | <b>*Last Name</b> | <b>*Suffix (eg, Jr, III)</b> | <b>Academic Degrees</b> | <b>Institution</b>                                                                                                                                                                                                                               | <b>Location (city, state/province, country)</b> | <b>Role or Contribution, eg, chair, principal investigator</b> | <b>Group (if more than 1 Group listed in the byline) and/or Subgroup (eg, Steering Committee)</b> |
| Stephen B.                                                 | Freedman          |                              | MDCM, MSc               | Sections of Pediatric Emergency Medicine and Gastroenterology, Departments of Pediatrics and Emergency Medicine, Alberta Children's Hospital, Alberta Children's Hospital Research Institute, Cumming School of Medicine, University of Calgary, | Calgary, Alberta, Canada                        | Protocol review, PERC facilitation, guidance and support       | Past Chair                                                                                        |
| Roger                                                      | Zemek             |                              | MD                      | Department of Pediatrics and Emergency Medicine, Children's Hospital of Eastern Ontario, University of Ottawa; CHEO Research Institute                                                                                                           | Ottawa, Ontario, Canada                         | Protocol review, PERC facilitation, guidance and support       | Chair                                                                                             |
| Samina                                                     | Ali               |                              | MDCM                    | Department of Pediatrics; Division of Pediatric Emergency Medicine, University of Alberta                                                                                                                                                        | Edmonton, Alberta, Canada                       | Protocol review, PERC facilitation, guidance and support       | Vice Chair                                                                                        |
| Maala                                                      | Bhatt             |                              | MD, MSc                 | Emergency Medicine Physician and Associate Professor, Department of Pediatrics, University of Ottawa                                                                                                                                             | Ottawa, Ontario, Canada                         | Guidance, study review, support                                | Executive Board Member                                                                            |
| Amanda (Mandi)                                             | Newton            |                              | PhD                     | Department of Pediatrics, Faculty of Medicine & Dentistry, University of Alberta                                                                                                                                                                 | Edmonton, Alberta, Canada                       | Guidance, study review, support                                | Executive Board Member                                                                            |
| Garth                                                      | Meckler           |                              | MD, MSHS                | Division of Pediatric Emergency Medicine, BC Children's Hospital                                                                                                                                                                                 | Vancouver, British Columbia, Canada             | Guidance, study review, support                                | Executive Board Member                                                                            |

## Supplemental Online Content: Nonauthor Collaborators

\*Indicates required information. Only first name, last name, and suffix will appear in PubMed.

| <b>*First Name and Middle Initial(s)</b> | <b>*Last Name</b> | <b>*Suffix (eg, Jr, III)</b> | <b>Academic Degrees</b> | <b>Institution</b>                                              | <b>Location (city, state/province, country)</b> | <b>Role or Contribution, eg, chair, principal investigator</b> | <b>Group (if more than 1 Group listed in the byline) and/or Subgroup (eg, Steering Committee)</b> |
|------------------------------------------|-------------------|------------------------------|-------------------------|-----------------------------------------------------------------|-------------------------------------------------|----------------------------------------------------------------|---------------------------------------------------------------------------------------------------|
| Naveen                                   | Poonai            |                              | MD, MSc                 | Lawson Health Research Institute, London Health Sciences Centre | London, Ontario, Canada                         | Guidance, study review, support                                | Executive Board Member                                                                            |
| Candice                                  | McGahern          |                              | BA                      | Children's Hospital of Eastern Ontario                          | Ottawa, Ontario, Canada                         | Guidance, study review, support                                | Coordinator Representative                                                                        |
| Kate                                     | Maki              |                              | MD                      | BC Children's Hospital                                          | Vancouver, British Columbia, Canada             | Guidance, study review, support                                | Fellows' Representative                                                                           |
| Rebecca                                  | Emerton           |                              | BA(Hons)                | Alberta Children's Hospital                                     | Calgary, Alberta, Canada                        | Guidance, PERC facilitation, study review, support             | Network Coordinator                                                                               |
